# Supplementary material
Source: PubMed Central journal article supplement (PMC2648074)
Supplement: tpc.108.063248_1.pdf [file tpc.108.063248_1.pdf]

Supplemental Data. Gerber et al. (2009). The Plastidial 2-*C*-Methyl-D-Erythritol 4-Phosphate Pathway Provides the Isoprenyl Moiety for Protein Geranylgeranylation in Tobacco BY-2 Cells.

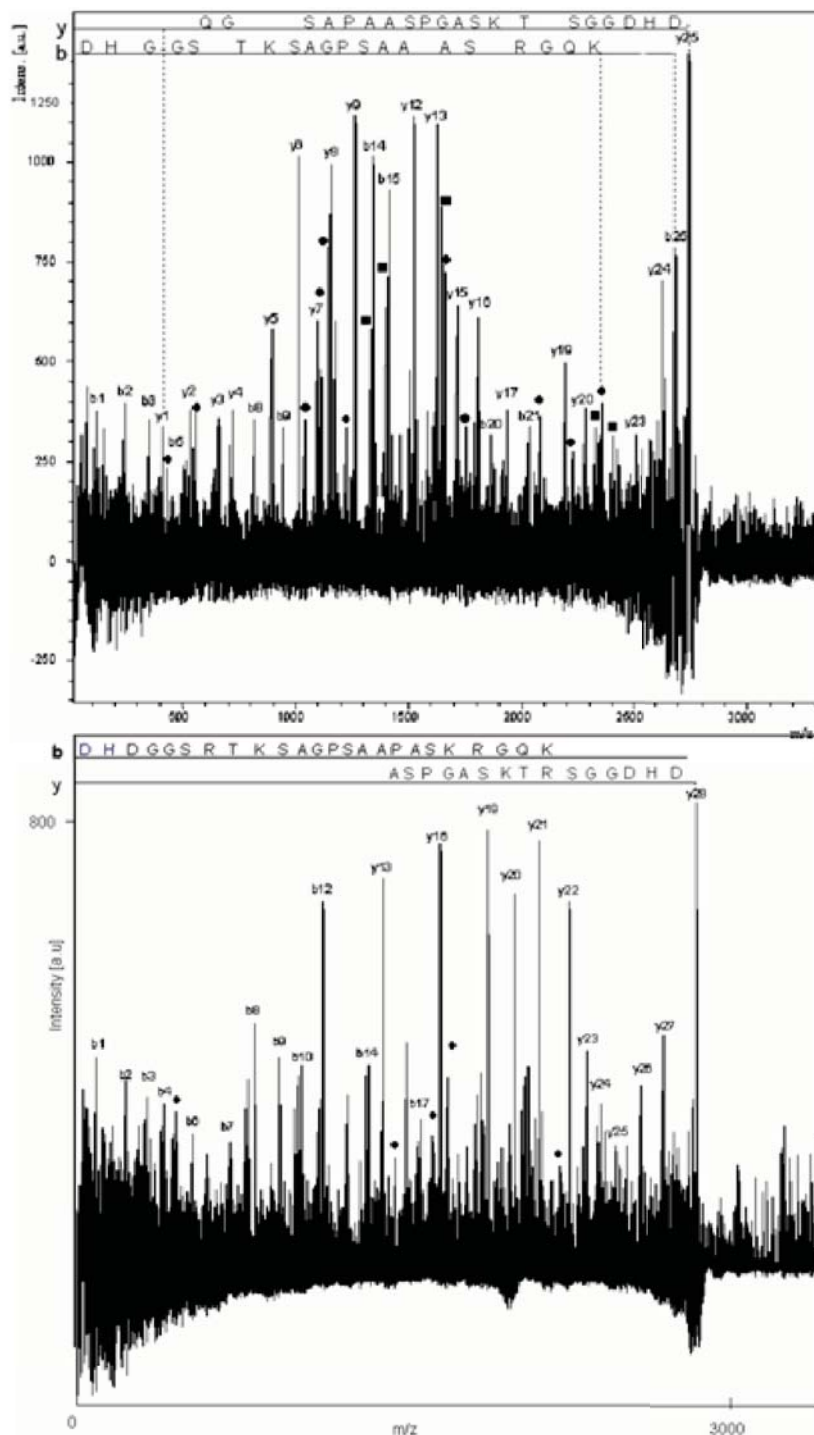

**Figure S1.** MALDI-TOF/TOF MS/MS spectra.

**(A)** Spectrum representing the fragmentation of the C-terminal modified peptide DHDGGSRTKSAGPSAAPASKRGQKC + (1) miss cleavage + methyl + S-geranylgeranyl identified by MALDI- TOF-MS in Figure 6. The peptide with the corresponding parent ion mass  $[M+H]^+ = 2756.620$  m/z (indicated by an arrow in Figure 6) was isolated and fragmented by LIFT CID for partial sequencing.

**(B)** Spectrum representing the fragmentation of the C-terminal modified peptide DHDGGSRTKSAGPSAAPASKRGQKCVIL + (1) miss cleavage identified by MALDI- TOF-MS (figure 6). The peptide with the corresponding parent ion mass  $[M+H]^+ = 2852.680$  m/z (indicated by an arrow) was isolated and fragmented by LIFT CID for partial sequencing.

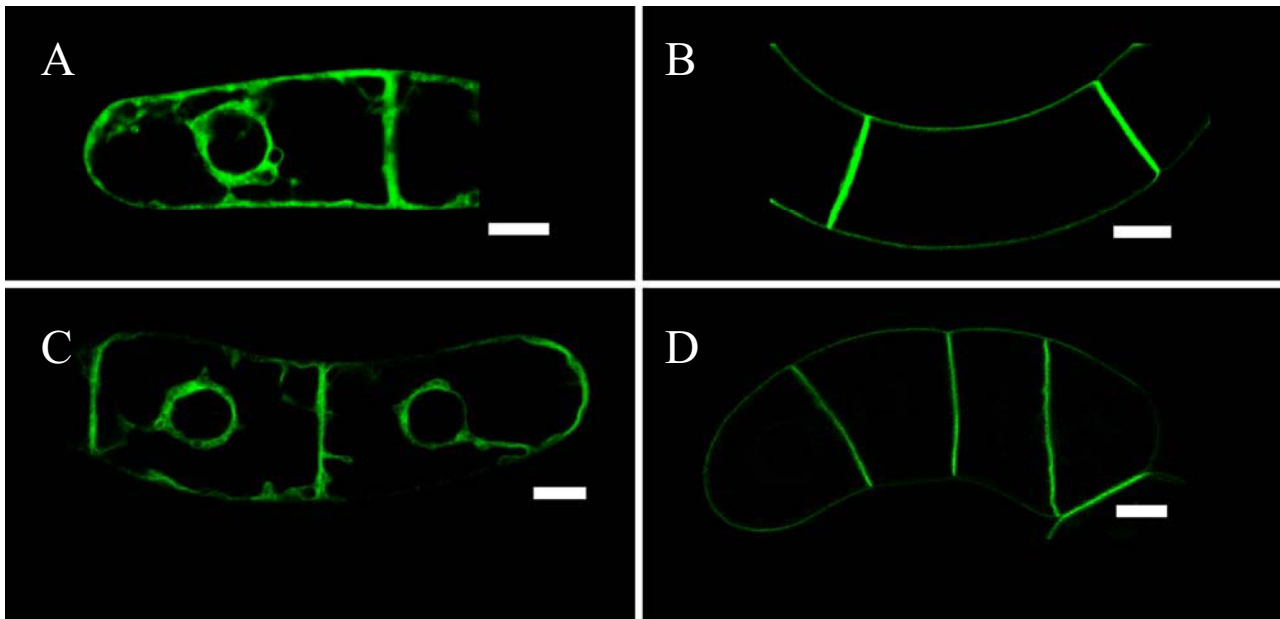

**Figure S2.** Addition of  $\text{Ca}^{2+}$  or the calmodulin inhibitor calmidazolium does not affect the localization of GFP-CaM61 or GFP-BD-CVIL.

**(A)** Localization of GFP-CaM61 in BY-2 cells treated with 1 mM calcium, showing GFP fluorescence associated with ER and perinuclear membranes, plasma membrane, and cytoplasmic strands.

**(B)** Localization of GFP-BD-CVIL in BY-2 cells treated with 1 mM calcium, showing GFP fluorescence associated exclusively with the plasma membrane.

**(C)** Localization of GFP-CaM61 in BY-2 cells treated with 5  $\mu\text{M}$  calmidazolium, showing GFP fluorescence associated with ER and perinuclear membranes, plasma membrane, and cytoplasmic strands.

**(D)** Localization of GFP-BD-CVIL in BY-2 cells treated with 5  $\mu\text{M}$  calmidazolium, showing GFP fluorescence associated with the plasma membrane. White bars correspond to 10  $\mu\text{m}$ .

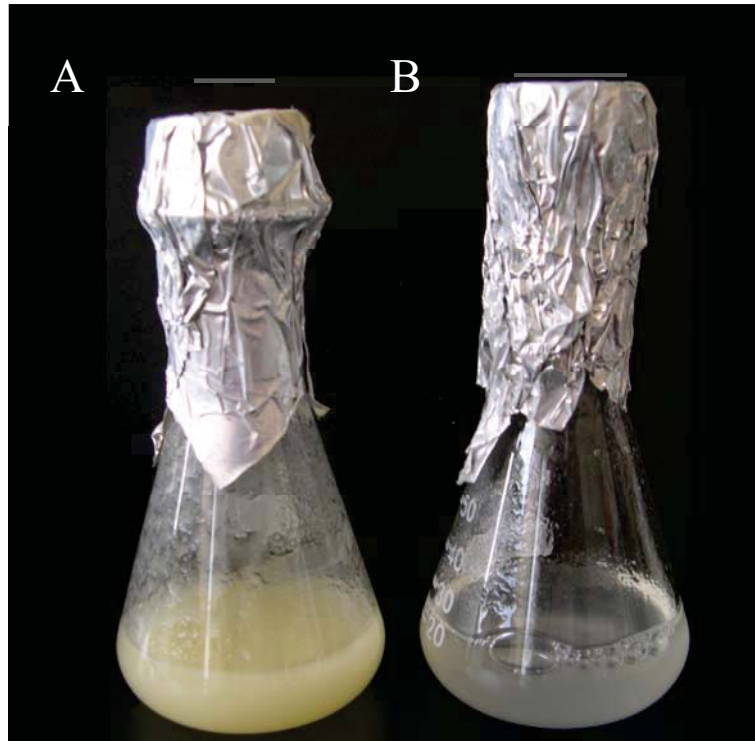

**Figure S3.** Mevinolin treatment of BY-2 cell cultures arrests cell growth.

**(A)** Control BY-2 cell culture.

**(B)** BY-2 cell culture treated with 5  $\mu$ M mevinolin

**Table S1.** Chi-squared analysis of data in Figure 3\*

|                          | Observed<br>(O) | Expected<br>(E) | O-E  | (O-E) <sup>2</sup> | (O-E) <sup>2</sup> /E | X <sup>2</sup>                          |
|--------------------------|-----------------|-----------------|------|--------------------|-----------------------|-----------------------------------------|
| MV5: PM                  | 161             | 161             | 0    | 0                  | 0                     | 0                                       |
| MV5:<br>Delocalized      | 3               | 3               | 0    | 0                  | 0                     | <b>P &gt; 0.05</b><br><b>Consistent</b> |
| Fos40: PM                | 81              | 233             | -152 | 23,104             | 99.16                 | 4,719.96                                |
| Fos40:<br>Delocalized    | 157             | 5               | 152  | 23,104             | 4,620.80              | 0.001 > P<br>Not<br>Consistent          |
| Fos40MV5:<br>PM          | 10              | 215             | -205 | 42,025             | 195.47                | 10,701.72                               |
| Fos40MV5:<br>Delocalized | 209             | 4               | 205  | 42,025             | 10,506.25             | 0.001 > P<br>Not<br>Consistent          |
| OC40: PM                 | 47              | 330             | -283 | 80,089             | 242.69                | 13,590.86                               |
| OC40:<br>Delocalized     | 289             | 6               | 283  | 80,089             | 13,348.17             | 0.001 > P<br>Not<br>Consistent          |
| OC40MV5:<br>PM           | 0               | 409             | -409 | 167,281            | 409                   | 21,319.13                               |
| OC40MV5:<br>Delocalized  | 417             | 8               | 409  | 167,281            | 20,910.13             | 0.001 > P<br>Not<br>Consistent          |

\*All values were compared by Chi-squared analysis against the null hypothesis (i.e., no effect compared to the control). Values with a  $P > 0.05$  were considered to be consistent with the null hypothesis. The only treatment found to be consistent with the null hypothesis was the MV5 treatment.

**Table S2.** Chi-squared analysis of data in Figure 4\*

|                                | Observed<br>(O) | Expected<br>(E) | O-E  | (O-E) <sup>2</sup> | (O-E) <sup>2</sup> /E | X <sup>2</sup>                          |
|--------------------------------|-----------------|-----------------|------|--------------------|-----------------------|-----------------------------------------|
| Fos40Gol20: PM                 | 60              | 60              | 0    | 0                  | 0                     | 0                                       |
| Fos40Gol20:<br>Delocalized     | 242             | 242             | 0    | 0                  | 0                     | <b>P &gt; 0.05</b><br><b>Consistent</b> |
| Fos40Fol20: PM                 | 164             | 47              | 117  | 13,689             | 291.26                | 363.31                                  |
| Fos40Fol20:<br>Delocalized     | 73              | 190             | -117 | 13,689             | 72.05                 | 0.001 > P<br>Not<br>Consistent          |
| Fos40GGol20: PM                | 91              | 18              | 73   | 5,329              | 296.06                | 369.06                                  |
| Fos40GGol20:<br>Delocalized    | 0               | 73              | -73  | 5,329              | 73                    | 0.001 > P<br>Not<br>Consistent          |
| Fos40MVA3: PM                  | 145             | 29              | 116  | 13,456             | 464                   | 578.03                                  |
| Fos40MVA3:<br>Delocalized      | 2               | 118             | -116 | 13,456             | 114.03                | 0.001 > P<br>Not<br>Consistent          |
| Fos40MV5Gol20:<br>PM           | 32              | 16              | 16   | 256                | 16                    | 17.08                                   |
| Fos40MV5Gol20:<br>Delocalized  | 220             | 236             | -16  | 256                | 1.08                  | 0.001 > P<br>Not<br>Consistent          |
| Fos40MV5Fol20:<br>PM           | 47              | 19              | 28   | 784                | 41.26                 | 44.19                                   |
| Fos40MV5Fol20:<br>Delocalized  | 240             | 268             | -28  | 784                | 2.93                  | 0.001 > P<br>Not<br>Consistent          |
| Fos40MV5GGol20:<br>PM          | 152             | 9               | 143  | 20,449             | 2,272.11              | 2,415.11                                |
| Fos40MV5GGol20:<br>Delocalized | 0               | 143             | -143 | 20,449             | 143                   | 0.001 > P<br>Not<br>Consistent          |
| Fos40MV5MVA3:<br>PM            | 107             | 7               | 100  | 10,000             | 1,428.57              | 1,528.57                                |
| Fos40MV5MVA3:<br>Delocalized   | 0               | 100             | -100 | 10,000             | 100                   | 0.001 > P<br>Not<br>Consistent          |

\*All values were compared by Chi-squared analysis against the null hypothesis (i.e., no complementation compared to the Fos40 or Fos40MV5 controls). Values with a P > 0.05 were considered to be consistent with the null hypothesis. The only treatment found to be consistent with the null hypothesis was the Fos40Gol20 treatment.
